# Supplementary material for: How to Measure the Mental Health of Teachers? Psychometric Properties of the GHQ-12 in a Large Sample of German Teachers
Source: MDPI journal article supplement (doi:10.3390/ijerph19159708), 2022-08-06
Supplement: s1 [file s1]

## APPENDIX/Supplementary Materials.

Table S1

*Demographics variables for the two subsample used in the construct validity analyses.*

| <i>n</i><br><i>Demographics</i>                                 | Subsample<br>MBI |      | Subsample LSS |      |
|-----------------------------------------------------------------|------------------|------|---------------|------|
|                                                                 | <i>n</i>         | %    | <i>n</i>      | %    |
| Gender                                                          |                  |      |               |      |
| Female                                                          | 577              | 72.8 | 2612          | 81.5 |
| Male                                                            | 147              | 18.5 | 569           | 17.8 |
| Age (years)                                                     |                  |      |               |      |
| < 35                                                            | 5                | 0.6  | 327           | 10.2 |
| 35-39                                                           | 40               | 5.0  | 380           | 11.9 |
| 40-44                                                           | 131              | 16.5 | 558           | 17.4 |
| 45-49                                                           | 116              | 14.6 | 618           | 19.3 |
| 50-54                                                           | 192              | 24.2 | 583           | 18.2 |
| >55                                                             | 309              | 39.0 | 721           | 22.5 |
| Relationship status                                             |                  |      |               |      |
| no                                                              | 175              | 22.1 | 608           | 19.0 |
| yes                                                             | 588              | 74.1 | 2560          | 79.9 |
| Tenure (years)                                                  |                  |      |               |      |
| < 10                                                            | 46               | 5.8  | 819           | 25.6 |
| 10-14                                                           | 207              | 26.1 | 857           | 26.8 |
| 15-19                                                           | 153              | 19.3 | 626           | 19.5 |
| >20                                                             | 383              | 48.3 | 896           | 28.0 |
| Teaching load                                                   |                  |      |               |      |
| 100%                                                            | 439              | 55.4 | 1521          | 47.5 |
| >75%                                                            | 155              | 19.5 | 684           | 21.4 |
| 50-75%                                                          | 179              | 22.6 | 792           | 24.7 |
| <50%                                                            | 13               | 1.6  | 193           | 6.0  |
| Leadership responsibility                                       |                  |      |               |      |
| No                                                              | 128              | 74.8 | 2737          | 85.5 |
| Yes                                                             | 593              | 16.1 | 318           | 9.9  |
| <i>School type</i>                                              |                  |      |               |      |
| Basic elementary school (1 <sup>st</sup> -4 <sup>th</sup> year) | 194              | 24.5 | 749           | 23.4 |
| Secondary school (5 <sup>th</sup> - 9 <sup>th</sup> year)       | 94               | 11.9 | 237           | 7.4  |
| Secondary school (5 <sup>th</sup> - 10 <sup>th</sup> year)      | 87               | 11.0 | 388           | 12.1 |
| High school (5 <sup>th</sup> -13 <sup>th</sup> year)            | 159              | 20.1 | 746           | 23.3 |
| Community school                                                | -                | -    | 117           | 3.7  |
| Vocational school                                               | 154              | 19.4 | 548           | 17.1 |
| special schools for mentally or physically handicapped pupils   | 91               | 11.5 | 381           | 11.9 |
| Others                                                          | 13               | 1.6  | 36            | 1.1  |

Note. MBI: Maslach Burnout Inventory, LSS: Life satisfaction scale.

Table S2

*Structure Matrix for Principal Axis Factor analysis with all 12 GHQ items.*

|         | Factor 1 | Factor 2 |
|---------|----------|----------|
| Item 10 | .777     | .664     |
| Item 8  | .773     | .546     |
| Item 7  | .739     | .603     |
| Item 9  | .726     | .443     |
| Item 2  | .724     | .355     |
| Item 3  | .604     | .430     |
| Item 1  | .591     | .381     |
| Item 12 | .568     | .853     |
| Item 11 | .629     | .780     |
| Item 4  | .455     | .586     |
| Item 6  | .545     | .550     |
| Item 5  | .004     | -.016    |

*Note.*  $N = 3909$ , extraction method: Principal Axis Factor analysis with promax rotation and Kaiser-normalization.<sup>a</sup> It took 12 iterations to extract 2 factors. Rotation took 3 iterations to converge.

Table S3

*Structure Matrix for Principal Axis Factor analysis with all 11 GHQ items.*

|         | Factor 1 | Factor 2 |
|---------|----------|----------|
| Item 8  | .769     | .606     |
| Item 10 | .763     | .710     |
| Item 2  | .735     | .427     |
| Item 7  | .728     | .650     |
| Item 9  | .728     | .507     |
| Item 3  | .601     | .478     |
| Item 1  | .591     | .430     |
| Item 12 | .522     | .846     |
| Item 11 | .595     | .791     |
| Item 4  | .428     | .592     |
| Item 6  | .525     | .574     |

*Note.*  $N = 3919$ , extraction method: Principal Axis Factor analysis with promax rotation and Kaiser-normalization.<sup>a</sup> It took 12 iterations to extract 2 factors. Rotation took 3 iterations to converge.

Table S4

*The role of burnout on GHQ-Factor 1 “depression/stress” (stepwise hierarchical regression)*

|                                           | Model 1 (Teaching-related variables) |     |              |         |          | Model 2 (Burnout) |     |              |         |          |
|-------------------------------------------|--------------------------------------|-----|--------------|---------|----------|-------------------|-----|--------------|---------|----------|
|                                           | B                                    | SE  | 95% CI       | $\beta$ | <i>p</i> | B                 | SE  | 95% CI       | $\beta$ | <i>p</i> |
| <i>Step 1: Covariates</i>                 |                                      |     |              |         |          |                   |     |              |         |          |
| Gender (female(ref.)/male)                | -.18                                 | .06 | (-.29; -.06) | -.13 ** |          | -.12              | .05 | (-.22; -.02) | -.09 *  |          |
| Age                                       | .03                                  | .02 | (-.02; .08)  | .07     |          | .01               | .02 | (-.03; .05)  | .03     |          |
| <i>Step 2: Teaching-related variables</i> |                                      |     |              |         |          |                   |     |              |         |          |
| Tenure                                    |                                      |     |              |         |          |                   |     |              |         |          |
| < 10 years(ref)                           |                                      |     |              |         |          |                   |     |              |         |          |
| 10-14 years                               | -.05                                 | .11 | (-.26; .16)  | -.04    |          | -.00              | .09 | (-.18; .18)  | .00     |          |
| 15-19 years                               | -.05                                 | .11 | (-.28; .18)  | -.04    |          | -.03              | .10 | (-.22; .17)  | -.02    |          |
| > 20 years                                | -.04                                 | .12 | (-.73; -.28) | -.04    |          | -.05              | .10 | (-.25; .15)  | -.05    |          |
| Teaching load                             |                                      |     |              |         |          |                   |     |              |         |          |
| 100% (ref)                                |                                      |     |              |         |          |                   |     |              |         |          |
| >75%                                      | .05                                  | .06 | (-.08; .17)  | .03     |          | .03               | .05 | (-.07; .14)  | .02     |          |
| 50-75%                                    | -.02                                 | .06 | (-.13; .10)  | -.01    |          | -.00              | .05 | (-.10; .10)  | -.00    |          |
| < 50%                                     | -.13                                 | .19 | (-.50; .25)  | -.03    |          | -.08              | .16 | (-.22; .17)  | -.02    |          |
| Leadership role (no(ref.)/yes)            | .06                                  | .07 | (-.06; .19)  | .04     |          | .12               | .06 | (.02; .23)   | .08 *   |          |
| <i>Step 3: Burnout</i>                    |                                      |     |              |         |          |                   |     |              |         |          |
| Emotional exhaustion                      |                                      |     |              |         |          | .41               | .03 | (.35; .46)   | .58 *** |          |
| Depersonalization                         |                                      |     |              |         |          | -.00              | .03 | (-.06; .06)  | -.00    |          |
| Professional efficacy                     |                                      |     |              |         |          | .07               | .04 | (-.00; .15)  | .08 +   |          |
| Adjusted $R^2$                            | .01                                  |     |              |         |          | .31               |     |              |         |          |
| Adjusted $\Delta R^2$                     | .00                                  |     |              |         |          | .30               |     |              |         |          |
| $\Delta F$                                | .38                                  |     |              |         |          | 92.81             | *** |              |         |          |

Note.  $N = 647$ . Adjusted  $R^2 = .02$  for Step 1. Durbin-Watson-Statistics = .97. ref.= reference category. +  $p < .1$ , \*  $p < .05$ , \*\*  $p < .01$ , \*\*\*  $p < .001$ .

Table S5

*The role of burnout on GHQ-Factor 2 “loss of confidence” (stepwise hierarchical regression)*

|                                           | Model 1 (Teaching-related variables) |     |              |         |          | Model 2 (Burnout) |     |              |         |          |
|-------------------------------------------|--------------------------------------|-----|--------------|---------|----------|-------------------|-----|--------------|---------|----------|
|                                           | B                                    | SE  | 95% CI       | $\beta$ | <i>p</i> | B                 | SE  | 95% CI       | $\beta$ | <i>p</i> |
| <i>Step 1: Covariates</i>                 |                                      |     |              |         |          |                   |     |              |         |          |
| Gender (female(ref.)/male)                | -.04                                 | .06 | (-.16; .08)  | -.03    |          | -.05              | .06 | (-.16; .06)  | -.03    |          |
| Age                                       | .02                                  | .03 | (-.03; .07)  | .05     |          | .01               | .02 | (-.04; .05)  | .01     |          |
| <i>Step 2: Teaching-related variables</i> |                                      |     |              |         |          |                   |     |              |         |          |
| Tenure                                    |                                      |     |              |         |          |                   |     |              |         |          |
| < 10 years(ref)                           |                                      |     |              |         |          |                   |     |              |         |          |
| 10-14 years                               | -.22                                 | .12 | (-.45; .00)  | -.16    | +        | -.12              | .10 | (-.31; .08)  | -.09    |          |
| 15-19 years                               | -.25                                 | .12 | (-.49; -.01) | -.17    | *        | -.18              | .11 | (-.38; .04)  | -.12    |          |
| > 20 years                                | -.24                                 | .13 | (-.50; .01)  | -.20    | +        | -.20              | .11 | (-.42; .02)  | -.17    | +        |
| Teaching load                             |                                      |     |              |         |          |                   |     |              |         |          |
| 100% (ref)                                |                                      |     |              |         |          |                   |     |              |         |          |
| >75%                                      | .07                                  | .07 | (-.07; .20)  | .04     |          | .02               | .06 | (-.10; .13)  | .01     |          |
| 50-75%                                    | .07                                  | .06 | (-.06; .20)  | .05     |          | .04               | .06 | (-.07; .15)  | .03     |          |
| < 50%                                     | .05                                  | .20 | (-.35; .44)  | .01     |          | .08               | .17 | (-.26; .43)  | .02     |          |
| Leadership role (no(ref.)/yes)            | -.03                                 | .07 | (-.17; .10)  | -.02    |          | .06               | .06 | (-.06; .18)  | .04     |          |
| <i>Step 3: Burnout</i>                    |                                      |     |              |         |          |                   |     |              |         |          |
| Emotional exhaustion                      |                                      |     |              |         |          | .31               | .03 | (.25; .37)   | .43     | ***      |
| Depersonalization                         |                                      |     |              |         |          | .04               | .03 | (-.03; .10)  | .05     |          |
| Professional efficacy                     |                                      |     |              |         |          | -.12              | .04 | (-.20; -.04) | -.12    | **       |
| Adjusted $R^2$                            | .00                                  |     |              |         |          | .26               |     |              |         |          |
| Adjusted $\Delta R^2$                     | .01                                  |     |              |         |          | .26               |     |              |         |          |
| $\Delta F$                                | 1.16                                 |     |              |         |          | 77.21             | *** |              |         |          |

Note.  $N = 647$ . Adjusted  $R^2 = .00$  for Step 1. Durbin-Watson-Statistics = 1.20. ref.= reference category. \*  $p < .05$ ,

\*\*  $p < .01$ , \*\*\*  $p < .001$ .

Table S6

*The role of life satisfaction on GHQ-Factor 1 “depression/stress” (stepwise hierarchical regression)*

|                                            | Model 1 (Teaching-related variables) |     |             |         |   | Model 2 (Life satisfaction) |     |              |         |     |
|--------------------------------------------|--------------------------------------|-----|-------------|---------|---|-----------------------------|-----|--------------|---------|-----|
|                                            | B                                    | SE  | 95% CI      | $\beta$ | p | B                           | SE  | 95% CI       | $\beta$ | p   |
| <i>Step 1: Covariates</i>                  |                                      |     |             |         |   |                             |     |              |         |     |
| Gender (female(ref.)/male)                 | -.03                                 | .03 | (-.09; .03) | -.02    |   | -.04                        | .03 | (-.09; .01)  | -.03    |     |
| Age                                        | .03                                  | .01 | (.01; .05)  | .09 *** |   | .01                         | .01 | (-.01; .02)  | .02     |     |
| <i>Step 2: Teaching-related variables</i>  |                                      |     |             |         |   |                             |     |              |         |     |
| Tenure                                     |                                      |     |             |         |   |                             |     |              |         |     |
| < 10 years (ref)                           |                                      |     |             |         |   |                             |     |              |         |     |
| 10-14 years                                | -.02                                 | .03 | (-.09; .04) | -.02    |   | -.01                        | .03 | (-.06; .05)  | -.00    |     |
| 15-19 years                                | -.07                                 | .04 | (-.15; .00) | -.05 +  |   | -.05                        | .03 | (-.11; .02)  | -.03    |     |
| > 20 years                                 | .02                                  | .04 | (-.07; .10) | .01     |   | .05                         | .04 | (-.03; .12)  | .04     |     |
| Teaching load                              |                                      |     |             |         |   |                             |     |              |         |     |
| 100% (ref)                                 |                                      |     |             |         |   |                             |     |              |         |     |
| >75%                                       | .02                                  | .03 | (-.03; .08) | .02     |   | .00                         | .03 | (-.05; .05)  | .00     |     |
| 50-75%                                     | .02                                  | .03 | (-.04; .07) | .01     |   | .02                         | .03 | (-.03; .07)  | .02     |     |
| < 50%                                      | .01                                  | .05 | (-.08; .10) | .00     |   | .02                         | .04 | (-.07; .10)  | .01     |     |
| Leadership role (no(ref.)/yes)             | .03                                  | .04 | (-.04; .10) | .02     |   | .11                         | .03 | (.05; .18)   | .06     | *** |
| <i>Step 3: Life satisfaction (AVEM-LZ)</i> |                                      |     |             |         |   |                             |     |              |         |     |
| Life satisfaction                          |                                      |     |             |         |   | -.32                        | .01 | (-.34; -.29) | -.44    | *** |
| Adjusted $R^2$                             | .01                                  |     |             |         |   | .20                         |     |              |         |     |
| Adjusted $\Delta R^2$                      | .00                                  |     |             |         |   | .19                         |     |              |         |     |
| $\Delta F$                                 | 1.43                                 |     |             |         |   | 688.12                      | *** |              |         |     |

Note.  $N = 3001$ . Adjusted  $R^2 = .01$  for Step 1. Durbin-Watson-Statistics = .66. ref.= reference category. \*  $p < .05$ ,

\*\*  $p < .01$ , \*\*\*  $p < .001$ .

Table S7

The role of life satisfaction GHQ-Factor 2 “loss of confidence” (stepwise hierarchical regression)

|                                            | Model 1 (Teaching-related variables) |     |              |             | Model 2 (Life satisfaction) |     |              |             |
|--------------------------------------------|--------------------------------------|-----|--------------|-------------|-----------------------------|-----|--------------|-------------|
|                                            | B                                    | SE  | 95% CI       | $\beta$ $p$ | B                           | SE  | 95% CI       | $\beta$ $p$ |
| <i>Step 1: Covariates</i>                  |                                      |     |              |             |                             |     |              |             |
| Gender (female(ref.)/male)                 | .04                                  | .03 | (-.02; .09)  | .02         | .03                         | .03 | (-.02; .08)  | .02         |
| Age                                        | .03                                  | .01 | (.01; .05)   | .09 **      | .00                         | .01 | (-.01; .02)  | .01         |
| <i>Step 2: Teaching-related variables</i>  |                                      |     |              |             |                             |     |              |             |
| Tenure                                     |                                      |     |              |             |                             |     |              |             |
| < 10 years (ref)                           |                                      |     |              |             |                             |     |              |             |
| 10-14 years                                | -.01                                 | .03 | (-.08; .05)  | -.01        | .01                         | .03 | (-.05; .06)  | .01         |
| 15-19 years                                | -.06                                 | .04 | (-.90; -.16) | -.04        | -.03                        | .03 | (-.09; .04)  | -.02        |
| > 20 years                                 | .00                                  | .04 | (-.08; .08)  | .00         | .03                         | .04 | (-.04; .11)  | .03         |
| Teaching load                              |                                      |     |              |             |                             |     |              |             |
| 100% (ref)                                 |                                      |     |              |             |                             |     |              |             |
| >75%                                       | .05                                  | .03 | (-.01; .10)  | .03         | .02                         | .03 | (-.03; .07)  | .02         |
| 50-75%                                     | .06                                  | .03 | (.01; .12)   | .05 *       | .07                         | .03 | (.02; .11)   | .05 **      |
| < 50%                                      | .10                                  | .05 | (.01; .19)   | .04 *       | .11                         | .04 | (.03; .19)   | .04 *       |
| Leadership role (no(ref.)/yes)             | -.11                                 | .04 | (-.18; -.04) | -.06 **     | -.03                        | .03 | (-.09; .04)  | -.01        |
| <i>Step 3: Life satisfaction (AVEM-LZ)</i> |                                      |     |              |             |                             |     |              |             |
| Life satisfaction                          |                                      |     |              |             | -.34                        | .01 | (-.37; -.32) | -.47 ***    |
| Adjusted $R^2$                             | .01                                  |     |              |             | .23                         |     |              |             |
| Adjusted $\Delta R^2$                      | .01                                  |     |              |             | .22                         |     |              |             |
| $\Delta F$                                 | 3.97                                 | *** |              |             | 846.47                      | *** |              |             |

Note.  $N = 3001$ . Adjusted  $R^2 = .005$  for Step 1. Durbin-Watson-Statistics = .94. ref.= reference category. \*  $p < .05$ , \*\*  $p < .01$ , \*\*\*  $p < .001$ .
